# Supplementary material
Source: PubMed Central journal article supplement (PMC2941407)
Supplement: Supp_Data.pdf [file Supp_Data.pdf]

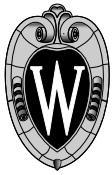

## Thyroid Hormone Replacement in Women of Reproductive Age: Surgery Survey

Dear Surgeon,

Hypothyroidism is a common condition in women. It can be caused by surgery and surgeons often place women with hypothyroidism on exogenous thyroid hormone replacement. This questionnaire is one of several designed to find out what information women of reproductive age receive about thyroid hormone replacement and from whom they receive the information. **You are one of just a few surgeons who will receive this survey. Your responses are of vital importance to our understanding of surgeon's ongoing practices.** This is a voluntary, confidential survey and results will be reported in summary form only. We greatly appreciate your participation in this important study.

1. Have you ever performed a thyroid surgery, such as a total thyroidectomy or thyroid lobectomy, on a female patient between 12 to 50 years of age?

- Yes → Go to question 2

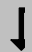

- No

1a. If you have not performed a thyroid surgery on a female patient aged 12-50, please **STOP** here and return your survey to the collection box located at registration.

It is very important to our research to record your response.

Thank you on behalf of the Paul P. Carbone Comprehensive Cancer Center.

2. In 2008, how many thyroid surgeries did you perform?

Number of thyroid surgeries performed

3. Of the thyroid surgeries you performed in 2008, about what percentage were for thyroid cancer?

- 0% or None
- 1% to 25%
- 26% to 50%
- 51% to 75%
- 76% to 99%
- 100% or All

4. Thinking about all of your patients in 2008 who were placed on thyroid hormone replacement, how many of these patients were either already seeing an endocrinologist or were referred to an endocrinologist?

- None
- A few
- Some
- Most
- All

(PLEASE CONTINUE SURVEY ON REVERSE SIDE)

5. Now, thinking about your patients in 2008 with thyroid cancer, how many of these patients were either already seeing an endocrinologist or were referred to an endocrinologist?

- None
- A few
- Some
- Most
- All

6. How often do you inform your female patients who are 12 to 50 years old and on thyroid hormone replacement, but not currently pregnant, that they may need a dose increase if they become pregnant?

- Never
- Rarely
- Sometimes
- Often
- Always

7. Have you read the 2007 Endocrine Society's Clinical Guidelines on Management of Thyroid Dysfunction during Pregnancy and Postpartum?

- Yes
- No

8. The last few questions are about your background.

a. What is your gender?

- Male
- Female

b. In 2008, in what type of setting did you practice surgery?

- Private practice
- Academic center

c. How many years has it been since completion of your training?

Number of years

- I am currently a Resident or Fellow

This study was funded by the Paul P. Carbone Comprehensive Cancer Center and approved for IRB exemption by the UW Health Sciences IRB in November 2008 (Protocol Number M-2008-1450)

**Contact Information:**

Megan R. Haymart, MD  
Division of Endocrinology, Diabetes, and Metabolism  
Department of Medicine  
University of Wisconsin School of Medicine and Public Health  
Cell: 608-347-3669

**Please return your completed survey to the collection box located at registration.  
Thank you on behalf of the Paul P. Carbone Comprehensive Cancer Center!**
